# Supplementary material
Source: MDPI journal article supplement (https://www.mdpi.com/2077-0472/11/3/259)
Supplement: s1 [file s1]

Archive with 2 entries (2 files):
- Corrections - Supplementary Material.pdf
- UV dose vs. PRRSV titer corrected.xlsx
