# Supplementary material
Source: MDPI journal article supplement (https://www.mdpi.com/2077-0472/11/3/259)
Supplement: s1 [file s1 › UV dose vs. PRRSV titer corrected.xlsx]

## Sheet: UV254 - corrected
Treatment	Nt (post UV treatment virus titer, log10 based TCID50/mL)	D (UV Dose, mJ/cm^2) - corrected	UV treatment time (sec)	N0 (control virus titer, log10 based TCID50/mL)	Nt-N0 (log10 based TCID50/mL)
1	3.75	0.69	0.258	3.75	0
1	3.25	0.69	0.258	3.88	-0.63
1	3.5	0.69	0.258	3.88	-0.38
1	3.63	0.69	0.258	4.25	-0.62
2	2.5	4.67	1.032	3.75	-1.25
2	2.5	4.67	1.032	3.88	-1.38
2	2.75	4.67	1.032	3.88	-1.13
2	2	4.67	1.032	4.25	-2.25
3	2.88	8.09	1.55	3.75	-0.87
3	2	8.09	1.55	3.88	-1.88
3	2.5	8.09	1.55	3.88	-1.38
3	N/D	8.09	1.55	4.25	N/A
4	N/D	7.27	1.29	3.75	N/A
4	N/D	7.27	1.29	3.88	N/A
4	N/D	7.27	1.29	3.88	N/A
4	N/D	7.27	1.29	4.25	N/A
5	3.75	0	0	3.75	0
5	3.88	0	0	3.88	0
5	3.88	0	0	3.88	0
5	4.25	0	0	4.25	0
6	2.25	9.14	1.806	3.75	-1.5
6	2.38	9.14	1.806	3.88	-1.5
6	3	9.14	1.806	3.88	-0.88
6	N/D	9.14	1.806	4.25	N/A
7	2.75	3.3	0.774	3.75	-1
7	2.75	3.3	0.774	3.88	-1.13
7	3	3.3	0.774	3.88	-0.88
7	2.38	3.3	0.774	4.25	-1.87
8	3.13	1.5	0.516	3.75	-0.62
8	3.25	1.5	0.516	3.88	-0.63
8	3	1.5	0.516	3.88	-0.88
8	2.88	1.5	0.516	4.25	-1.37
	N/D = Not detected in the bioassay (too low to be detected)
	N/A = Not applicable

## Sheet: UV222 - corrected
Treatment	Nt (post UV treatment virus titer, log10 based TCID50/mL)	D (UV Dose, mJ/cm^2)	UV treatment time (sec)	N0 (control virus titer, log10 based TCID50/mL)	Nt-N0 (log10 based TCID50/mL)
1	3.5	0.19	0.258	4	-0.5
1	4.25	0.19	0.258	4.13	0.12
1	4	0.19	0.258	4.13	-0.13
1	3.5	0.19	0.258	3.75	-0.25
2	2.5	1.53	1.032	4	-1.5
2	2.63	1.53	1.032	4.13	-1.5
2	2	1.53	1.032	4.13	-2.13
2	N/D	1.53	1.032	3.75	N/A
3	N/D	2.46	1.55	4	N/A
3	N/D	2.46	1.55	4.13	N/A
3	N/D	2.46	1.55	4.13	N/A
3	N/D	2.46	1.55	3.75	N/A
4	N/D	2.14	1.29	4	N/A
4	2.5	2.14	1.29	4.13	-1.63
4	N/D	2.14	1.29	4.13	N/A
4	N/D	2.14	1.29	3.75	N/A
5	4	0	0	4	0
5	4.13	0	0	4.13	0
5	4.13	0	0	4.13	0
5	3.75	0	0	3.75	0
6	N/D	2.4	1.806	4	N/A
6	N/D	2.4	1.806	4.13	N/A
6	N/D	2.4	1.806	4.13	N/A
6	N/D	2.4	1.806	3.75	N/A
7	2.875	0.86	0.774	4	-1.125
7	2.75	0.86	0.774	4.13	-1.38
7	2	0.86	0.774	4.13	-2.13
7	2.5	0.86	0.774	3.75	-1.25
8	3.13	0.43	0.516	4	-0.87
8	3.38	0.43	0.516	4.13	-0.75
8	3.38	0.43	0.516	4.13	-0.75
8	3.25	0.43	0.516	3.75	-0.5
	N/D = Not detected in the bioassay (too low to be detected)
	N/A = Not applicable

## Sheet: UV365 fluo
Treatment	Nt (post UV treatment virus titer, log10 based TCID50/mL)	D (UV Dose, mJ/cm^2)	UV treatment time (sec)	N0 (control virus titer, log10 based TCID50/mL)	Nt-N0 (log10 based TCID50/mL)
1	4	0.10707	0.258	4.25	-0.25
1	3.13	0.10707	0.258	3.25	-0.12
1	3.88	0.10707	0.258	3.88	0
1	3.63	0.10707	0.258	3.5	0.13
2	3.75	0.730398	1.032	4.25	-0.5
2	3	0.730398	1.032	3.25	-0.25
2	3.88	0.730398	1.032	3.88	0
2	3.63	0.730398	1.032	3.5	0.13
3	4.13	1.23195	1.55	4.25	-0.12
3	3.25	1.23195	1.55	3.25	0
3	4	1.23195	1.55	3.88	0.12
3	4	1.23195	1.55	3.5	0.5
4	4.13	1.05935	1.29	4.25	-0.12
4	3.13	1.05935	1.29	3.25	-0.12
4	3.63	1.05935	1.29	3.88	-0.25
4	3.75	1.05935	1.29	3.5	0.25
5	4.25	0	0	4.25	0
5	3.25	0	0	3.25	0
5	3.88	0	0	3.88	0
5	3.5	0	0	3.5	0
6	4.13	1.53621	1.806	4.25	-0.12
6	2.88	1.53621	1.806	3.25	-0.37
6	3.75	1.53621	1.806	3.88	-0.13
6	3.5	1.53621	1.806	3.5	0
7	3.88	0.477816	0.774	4.25	-0.37
7	3.25	0.477816	0.774	3.25	0
7	3.5	0.477816	0.774	3.88	-0.38
7	3.38	0.477816	0.774	3.5	-0.12
8	3.88	0.203046	0.516	4.25	-0.37
8	3	0.203046	0.516	3.25	-0.25
8	4.13	0.203046	0.516	3.88	0.25
8	3.38	0.203046	0.516	3.5	-0.12

## Sheet: UV365 LED
Treatment	Nt (post UV treatment virus titer, log10 based TCID50/mL)	D (UV Dose, mJ/cm^2)	UV treatment time (sec)	N0 (control virus titer, log10 based TCID50/mL)	Nt-N0 (log10 based TCID50/mL)
1	3.63	0.370746	0.258	3.5	0.13
1	4.13	0.370746	0.258	4	0.13
1	3.5	0.370746	0.258	4	-0.5
1	4.13	0.370746	0.258	4.13	0
2	3.88	1.96441	1.032	3.5	0.38
2	4	1.96441	1.032	4	0
2	4.13	1.96441	1.032	4	0.13
2	4.13	1.96441	1.032	4.13	0
3	3.88	3.12335	1.55	3.5	0.38
3	3.88	3.12335	1.55	4	-0.12
3	4.5	3.12335	1.55	4	0.5
3	3.75	3.12335	1.55	4.13	-0.38
4	4.13	2.59883	1.29	3.5	0.63
4	4.13	2.59883	1.29	4	0.13
4	4	2.59883	1.29	4	0
4	3.75	2.59883	1.29	4.13	-0.38
5	3.5	0	0	3.5	0
5	4	0	0	4	0
5	4	0	0	4	0
5	4.13	0	0	4.13	0
6	4.13	4.10707	1.806	3.5	0.63
6	4.13	4.10707	1.806	4	0.13
6	4.13	4.10707	1.806	4	0.13
6	4	4.10707	1.806	4.13	-0.13
7	4.38	1.3723	0.774	3.5	0.88
7	4.13	1.3723	0.774	4	0.13
7	3.88	1.3723	0.774	4	-0.12
7	4	1.3723	0.774	4.13	-0.13
8	3.88	0.731946	0.516	3.5	0.38
8	3.75	0.731946	0.516	4	-0.25
8	4.88	0.731946	0.516	4	0.88
8	4.5	0.731946	0.516	4.13	0.37
